# Supplementary material for: Biological factors in plasma from diabetes mellitus patients enhance hyperglycaemia and pulsatile shear stress-induced endothelial cell apoptosis
Source: Royal Society of Chemistry journal article supplement (doi:10.1039/c3ib40265g), 2014-01-01
Supplement: c3ib40265g1.pdf [file c3ib40265g1.pdf]

Electronic Supplementary Information

**Biological factors in plasma from diabetes mellitus patients enhance hyperglycaemia and  
pulsatile shear stress-induced endothelial cell apoptosis**

X. F. Liu,<sup>a</sup> J. Q. Yu,<sup>b</sup> R. Dalan,<sup>cde</sup> A. Q. Liu,<sup>b</sup> and K. Q. Luo,<sup>\*a</sup>

*<sup>a</sup>School of Chemical and Biomedical Engineering*

*Nanyang Technological University, 70 Nanyang Drive, Singapore 637457*

*<sup>b</sup>School of Electrical and Electronic Engineering*

*Nanyang Technological University, 50 Nanyang Avenue, Singapore 639798*

*<sup>c</sup>Department of Endocrinology*

*Tan Tock Seng Hospital, Singapore 308433*

*<sup>d</sup>Yong Loo Lin School of Medicine*

*National University of Singapore, Singapore 119228*

*<sup>e</sup>DUKE-NUS Graduate School of Medicine*

*National University of Singapore, Singapore 169547*

\*Corresponding author: Kathy Qian Luo, School of Chemical and Biomedical Engineering

Nanyang Technological University, 70 Nanyang Drive, Singapore 637457

E-mail: kluo@ntu.edu.sg, Tel: +65 6790-4257

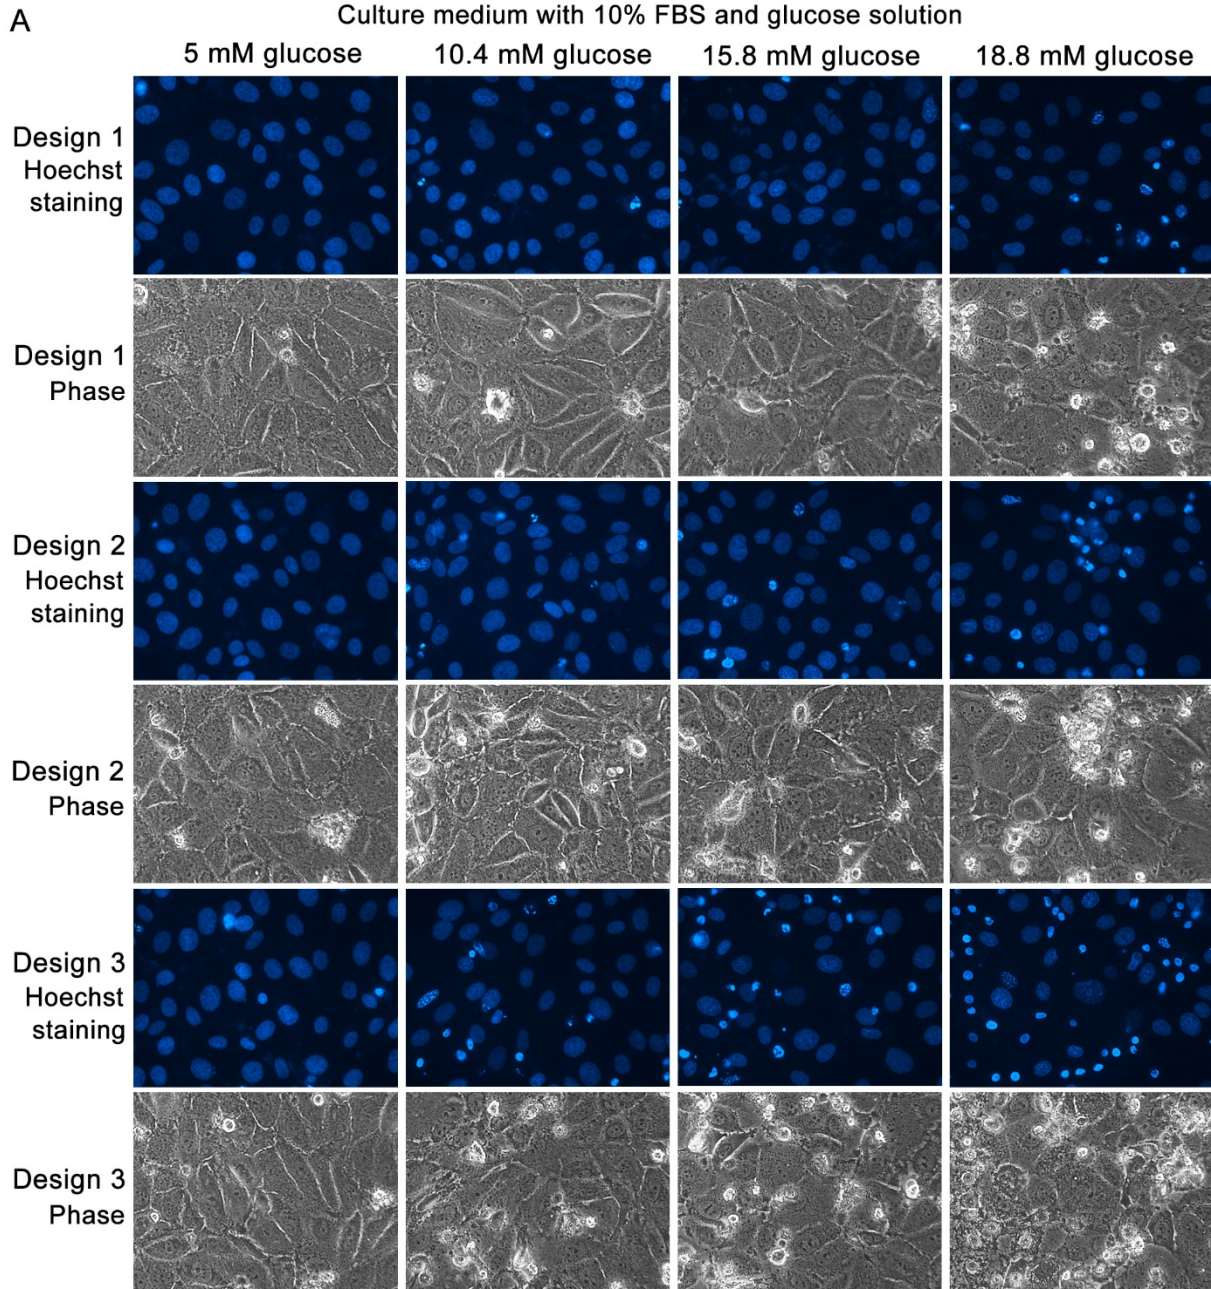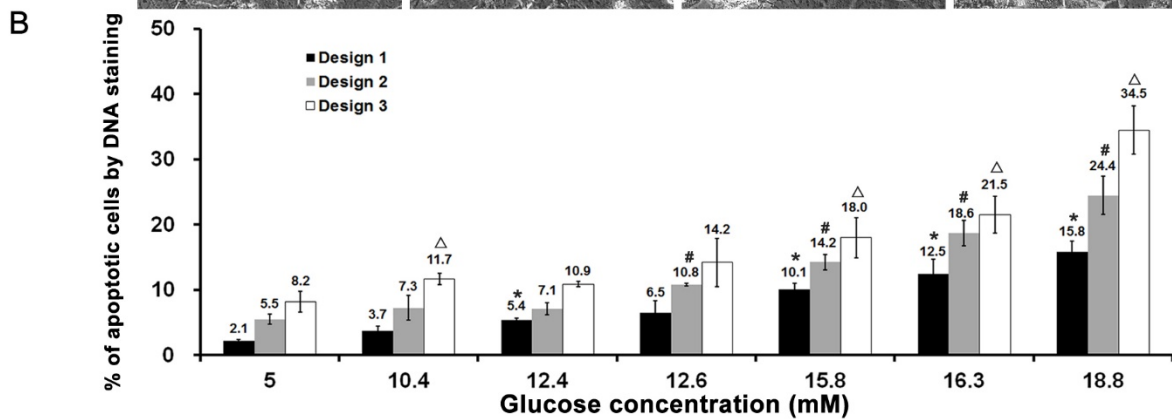

**Figure S1.** (A) Hoechst staining and phase images of HUVEC cells under different glucose concentrations and different microchannel designs using medium with 10% FBS and defined glucose solutions of which the concentrations were equivalent to the plasma samples, and (B) The percentage of apoptotic cells determined by analysing 1,000-2,000 cells by Hoechst staining under different glucose concentrations and different microchannel designs ( $p < 0.05$  compared to 5 mM glucose in samples of A or B in microchannel design 1 <sup>\*</sup>, design 2 <sup>#</sup> and design 3 <sup>Δ</sup>, respectively).

**Table S1.** Demographics, physical characteristics and concomitant conditions in healthy volunteers.

|                             | Volunteer 1 | Volunteer 2 | Volunteer 3 |
|-----------------------------|-------------|-------------|-------------|
| Age                         | 62          | 63          | 27          |
| Sex                         | Female      | Female      | Female      |
| Ethnicity                   | Chinese     | Chinese     | Indian      |
| BMI                         | 28.9        | 23          | 25.9        |
| Smoking Status              | Non-smoker  | Non-smoker  | Non-smoker  |
| Concomitant hypertension    | Yes         | No          | No          |
| Concomitant hyperlipidaemia | No          | Yes         | No          |
| ACE-I                       | Yes         | No          | No          |
| Aspirin                     | Yes         | No          | No          |
| Statin                      | No          | Yes         | No          |

ACE-I: Angiotensin Converting Enzyme Inhibitor, eGFR: Estimated GFR using the MDRD formula, BMI: Basal metabolic index calculated as weight in kg/(height in m)<sup>2</sup>

**Table S2.** Demographics, physical characteristics and concomitant Conditions in the type 2 DM patients.

|                                 | Patient 1  | Patient 2  | Patient 3  | Patient 4 | Patient 5  | Patient 6 |
|---------------------------------|------------|------------|------------|-----------|------------|-----------|
| Age                             | 39         | 50         | 53         | 61        | 58         | 65        |
| Sex                             | Female     | Male       | Male       | Male      | Female     | Male      |
| Ethnicity                       | Chinese    | Malay      | Chinese    | Chinese   | Chinese    | Chinese   |
| BMI                             | 28.1       | 29.3       | 28.2       | 27.9      | 30.4       | 24.9      |
| Smoking Status                  | Non-smoker | Non-smoker | Non-smoker | Smoker    | Non-smoker | Ex-smoker |
| Hypertension                    | Yes        | Yes        | Yes        | Yes       | Yes        | Yes       |
| Hyperlipidaemia                 | Yes        | Yes        | Yes        | Yes       | Yes        | Yes       |
| Aspirin                         | No         | Yes        | Yes        | Yes       | Yes        | Yes       |
| ACE-I                           | No         | Yes        | Yes        | Yes       | Yes        | Yes       |
| ARB                             | Yes        | No         | No         | No        | Yes        | No        |
| Metformin                       | Yes        | Yes        | Yes        | Yes       | Yes        | Yes       |
| Sulfonylurea                    | Yes        | No         | Yes        | Yes       | No         | Yes       |
| Insulin                         | Yes        | Yes        | No         | No        | Yes        | Yes       |
| Statin                          | Yes        | Yes        | Yes        | Yes       | Yes        | Yes       |
| Capillary blood glucose(mmol/l) | 10.4       | 12.4       | 12.6       | 16.3      | 18.8       | 15.8      |
| HbA1c (%)                       | 10.0       | 9.6        | 11.2       | 9.2       | 11.5       | 10.6      |
| eGFR                            | >60        | 50         | 45         | >60       | >60        | 38        |
| Nephropathy                     | No         | Mild       | Mild       | No        | No         | Mild      |
| Retinopathy                     | No         | No         | No         | No        | No         | No        |

ACE-I: Angiotensin Converting Enzyme Inhibitor, ARB: Angiotensin receptor blockers.

eGFR: Estimated GFR using the MDRD formula.
